# Supplementary material
Source: Research Square preprint supplement (doi:10.21203/rs.3.rs-8560704/v1)
Supplement: Supplementary file 1 [file 14abb520085aadc898df184e.docx]

**Mosquito Age-grading and Infrared techniques**

**Understanding the current challenges in measuring mosquito survival and its potential use in malaria surveillance and control**

**Introduction**

The main goal of this survey is to understand and identify the challenges and gaps involved with implementation of mosquito age-grading during vector control and surveillance. The initial step is to collect information on the types of vector surveillance and control activities in place. We will then gather information on the primary entomological indicators used in malaria surveillance. We will ask whether you or your team collect information on mosquito age or survivorship, and get your opinion on the advantages, challenges, and limitations of these methods. Finally, we will gather information on how to advance the infrared spectroscopy & AI methods for malaria vector surveillance that are acceptable to key stakeholders in Africa and can be effectively incorporated into existing protocols. We would love to hear your perspectives and insight regarding this matter. This will help us improve mosquito surveillance through various ways such as infrared spectroscopy techniques. The survey should only take 5 minutes, and your responses are completely anonymous.

**Respondents: All entities conducting malaria surveillance**

**Section 1**

**General Information**

1. Name:………………………….
2. Gender
3. Female
4. Male
5. Prefer not to say
6. Age
7. 20 – 35
8. 36 – 45
9. 46 – 55
10. 56 – 65
11. Above 65
12. Level of Education
13. Bachelor
14. Masters
15. Doctorate
16. Collage/Training
17. Have you attended any course on practical entomology or a related area? If so, please give a brief description of any courses related to practical entomology that you have attended.
18. Job Title:……………….
19. Institutional Name:……………..
20. Year you joined the entity:……………..

**Section 2: Surveillance Types**

1. Can you indicate the frequency of different surveillance types that you or your organisation carries out? *(frequently =~ weekly, occasionally =~ monthly, rarely =~yearly)*

|  | Frequently | Occasionally | Rarely | Never |
| --- | --- | --- | --- | --- |
| Surveillance of adult mosquitoes |  |  |  |  |
| Surveillance of mosquito larvae |  |  |  |  |
| Surveillance of insecticide resistance in mosquitoes |  |  |  |  |
| Surveillance of malaria infection in people |  |  |  |  |

**Section 3: Mosquito surveillance and Intervention type**

1. For what reasons are you doing mosquito surveillance?
2. Indicate the frequency at which you/your team conducts vector surveillance for assessment of the following interventions? (frequently =~ weekly, occasionally =~ monthly, rarely =~yearly)

|  | Frequently | Occasionally | Rarely | Never |
| --- | --- | --- | --- | --- |
| Insecticide Treated Nets (ITNs) |  |  |  |  |
| Indoor Residual Spraying (IRS) |  |  |  |  |
| Larviciding |  |  |  |  |
| Attractive Toxic Sugar Bait (ATSB) |  |  |  |  |

**Section 4: Mosquito vectors**

1. Which of these mosquito vectors do you do surveillance on?
2. *Anopheles gambiae* complex
3. *Anopheles funestus* group
4. Culicines mosquito species
5. *Anopheles stephensi*

**Section 5: Entomological Indicators**

1. Which of these mosquito vectors do you do surveillance on?

|  | Low Priority | Intermediate Priority | Low Priority |
| --- | --- | --- | --- |
| Entomological inoculation rate (EIR) |  |  |  |
| Insecticide resistance status |  |  |  |
| Adult mosquito density |  |  |  |
| Human blood index |  |  |  |
| Mosquito biting time |  |  |  |
| Indoor human biting rate |  |  |  |
| Outdoor human biting rate |  |  |  |
| Sporozoite rate |  |  |  |
| Mosquito parity rate |  |  |  |
| Number of gonotrophic cycles |  |  |  |
| Mosquito specie identification |  |  |  |
| Mosquito larvae presence/abundance in aquatic habitats |  |  |  |
| Other (Specify): |  |  |  |

**Section 6: Mosquito Age-grading/Parity**

Mosquito age can be defined by the number of days an adult female mosquito has lived. This can be indirectly estimated based on whether a mosquito has laid eggs or not (“nulliparous” or “parous”), or by the number of egg laying cycles a female mosquito has completed (number of gonotrophic cycles completed.  This is because the age at which mosquitoes lay their first batch of eggs, and the number of days between each egg laying cycle, is known.

1. Do you measure either mosquito parity or the number of gonotrophic cycles they've completed during surveillance?
2. Yes
3. No
4. I don’t know
5. Do you consider mosquito survival to be an important indicator to collect during vector surveillance?
6. Yes
7. No
8. I don’t know
9. Could you explain the reasons why is it important to collect this indicator during surveillance?
10. Could you explain reasons to why you think age-grading is not an important indicator to collect during surveillance?
11. To what degree are you aware of the following techniques for age-grading mosquitoes? *Rate the familiarity of different techniques listed below*

|  | Familiar | Not Familiar | Slightly Familiar | Not Familiar |
| --- | --- | --- | --- | --- |
| Parity rate/Ovary tracheation dissection (Detinova method) |  |  |  |  |
| Ovarian dilatation/gonotrophic cycle dissection (Polovodova method) |  |  |  |  |
| Near infrared spectroscopy (NIRS) |  |  |  |  |
| Mid infrared spectroscopy (MIRS) |  |  |  |  |
| Wing Fray |  |  |  |  |

**Section 7: Infrared Reflectance Spectroscopy (IRS)**

IRS is an alternative technique that is under development for estimating mosquito vector age, species (i.e., within the An. gambiae complex) (PMID: 31544155, PMID: 353146883) and identify mosquito blood meal source (PMID: 31146762) and infection status (PMID: 31590669). IRS analysis requires an infrared spectrometer machine which can measure variation in the Near Infrared Spectrum (NIRS, 12,500 cm−1 to 4,000 cm−1 frequencies) and Mid Infrared Spectrum (MIRS, 4000 to 400 cm-1 frequencies). To measure a single mosquito usually takes ~30-60 seconds. No other reagents are required (PMID: 31544155).

1. Have you heard on the use of infrared spectroscopy (NIRS, MIRS or both) for mosquito surveillance before?
2. Yes
3. No
4. I don’t know
5. Based on your knowledge and understanding of IRS, how will you be willing to invest in this infrared technology for mosquito surveillance?

|  | Very willing | Moderate willing | Somewhat willing | Not willing |
| --- | --- | --- | --- | --- |
| Near infrared spectroscopy (NIRS) |  |  |  |  |
| Mid infrared spectroscopy (MIRS) |  |  |  |  |
| Both NIRS/MIRS |  |  |  |  |

1. Do you have access to an infrared spectrometer in your institution?
2. Yes
3. No
4. I don’t know
5. If you had the equipment for performing IRS, how easily do you think this method could be incorporated into your current surveillance activities?
6. Extremely easily
7. Moderately easily
8. Not feasible/easy
9. I don’t know
10. Are there any concerns or reservations you have about using infrared spectroscopy tools for mosquito surveillance?
11. Yes
12. No
13. I don’t know
14. Will you be willing to send your mosquito samples in a centralised area or institution with an infrared spectroscopy for scanning during mosquito surveillance?
15. Yes
16. No
17. I don’t know

**Section 8: Knowledge on Age-grading methods**

**Based on your knowledge of the age-grading methods, how would you rate them based on the following criteria**

1. Can be taught to a non-expert

|  | High | Low | Medium | Don’t Know |
| --- | --- | --- | --- | --- |
| Parity rate |  |  |  |  |
| Number of ovarian dilatations |  |  |  |  |
| NIRS |  |  |  |  |
| MIRS |  |  |  |  |
| Wing Fray |  |  |  |  |

1. Can be implemented at a large scale

|  | High | Low | Medium | Don’t Know |
| --- | --- | --- | --- | --- |
| Parity rate |  |  |  |  |
| Number of ovarian dilatations |  |  |  |  |
| NIRS |  |  |  |  |
| MIRS |  |  |  |  |
| Wing Fray |  |  |  |  |

1. Accuracy and Precision

|  | High | Low | Medium | Don’t Know |
| --- | --- | --- | --- | --- |
| Parity rate |  |  |  |  |
| Number of ovarian dilatations |  |  |  |  |
| NIRS |  |  |  |  |
| MIRS |  |  |  |  |
| Wing Fray |  |  |  |  |

1. Cost effectiveness

|  | High | Low | Medium | Don’t Know |
| --- | --- | --- | --- | --- |
| Parity rate |  |  |  |  |
| Number of ovarian dilatations |  |  |  |  |
| NIRS |  |  |  |  |
| MIRS |  |  |  |  |
| Wing Fray |  |  |  |  |

**Section 9: Use of age-grading methods and Recommendations**

1. Which of these methods do you use in estimating the age of mosquitoes?
2. Parity rate
3. Number of ovarian dilatations
4. NIRS
5. MIRS
6. Wing Fray
7. None of the Above
8. Are there any age-grading techniques you want to use but you don't? Briefly explain reasons to why?
9. Do you have any additional suggestions for how mosquito age-grading could be made easier to implement in vector surveillance?
10. Please provide your email address if you would be interested in participating to a workshop or training to learn about IRS technology and how to use it for mosquito surveillance or contacted for any further information (optional)
